# Supplementary material for: The diagnostic and prognostic role of RhoA in hepatocellular carcinoma
Source: publisher site journal article supplement (doi:10.18632/aging.102110), 2019-07-22
Supplement: Supplementary file [file aging-v11i14-102110-supplementary-material-SD1.pdf]

SUPPLEMENTARY FIGURE

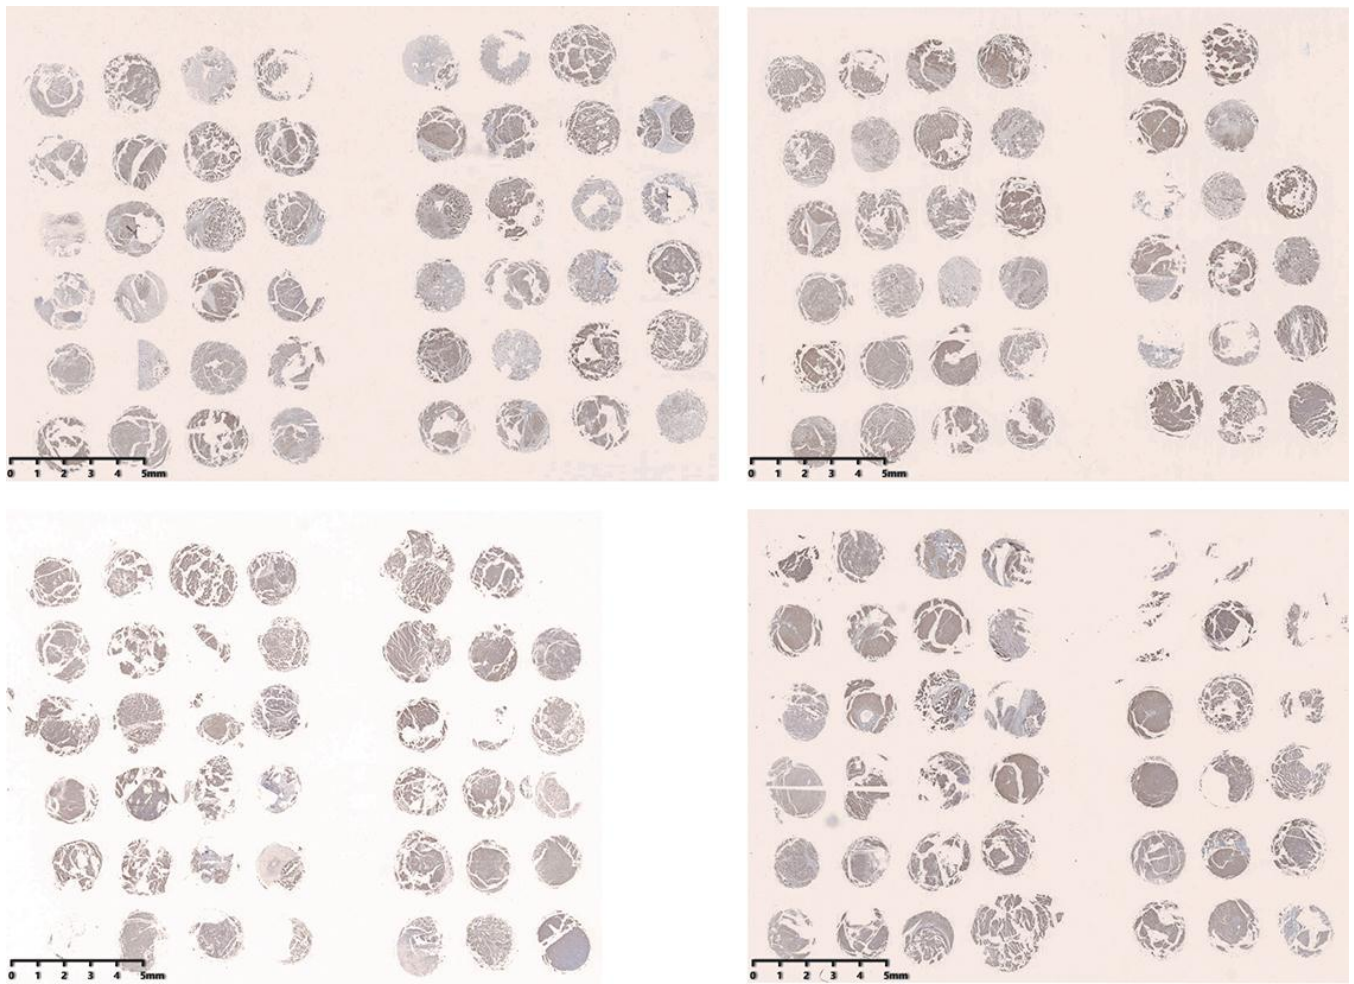

Supplementary Figure 1.
