# Supplementary material for: The diagnostic and prognostic role of RhoA in hepatocellular carcinoma
Source: Aging (Albany NY). 2019 Jul 22;11(14):5158–72. doi: 10.18632/aging.102110 (PMC6682515; doi:10.18632/aging.102110)
Supplement: Supplementary Table 1 [file aging-11-102110-s001.xlsx]

## Sheet: Sheet1
Supplementary Table 1. Clinical information and RhoA expression.
ID	OS	Event	Age	Gender	Height	Weight	BMI	Race	T	N	M	Stage	Grade	AFP	Fibrosis(0-6)	Inflammation extent	Vascular invasion	Family history	Risk factors	RHOA
TCGA-2Y-A9GU	1939	0	55	FEMALE	154	78	32.8892	WHITE	T1	NX	MX	Stage I	G2	304	Unknown	None	Unknown	YES	No History of Primary Risk Factors	4772.49
TCGA-2Y-A9GV	2532	1	54	FEMALE	167	85	30.478	WHITE	T1	NX	MX	Stage I	G1	6	Unknown	Unknown	Unknown	NO	Alcohol consumption	9819.52
TCGA-2Y-A9GY	757	1	64	FEMALE	161	92	35.4925	WHITE	T2	NX	MX	Stage II	G3	27600	Unknown	None	Unknown	YES	No History of Primary Risk Factors	15363.6
TCGA-2Y-A9GZ	848	1	82	FEMALE	153	51	21.7865	WHITE	T2	NX	MX	Stage II	G2	7	Unknown	None	Unknown	YES	No History of Primary Risk Factors	8162.62
TCGA-2Y-A9H2	1731	0	64	FEMALE	176	55	17.7557	WHITE	T1	N0	MX	Stage I	G3	2	Unknown	None	None	NO	Alcohol consumption	9124.4
TCGA-2Y-A9H5	555	1	59	FEMALE	157	69	27.993	WHITE	T1	N0	MX	Stage I	G3	11700	1,2 - Portal Fibrosis	Unknown	None	YES	Alcohol consumption;Hepatitis C	10241.2
TCGA-2Y-A9H6	357	0	68	FEMALE	156	99	40.6805	WHITE	T1	NX	MX	Stage I	G2	114	Unknown	None	Macro	YES	Alcohol consumption	8886.07
TCGA-2Y-A9H7	1168	0	81	FEMALE	157	104	42.1924	WHITE	T1	N0	MX	Stage I	G2	6	3,4 - Fibrous Speta	None	None	NO	No History of Primary Risk Factors	11882.9
TCGA-2Y-A9H8	633	1	85	FEMALE	150	40	17.7778	WHITE	T1	NX	MX	NA	G2	234000	Unknown	Unknown	Unknown	YES	Alcohol consumption	7307.53
TCGA-5R-AA1D	449	0	17	FEMALE	161	59	22.7615	WHITE	T3a	N0	M0	Stage IIIA	G3	5	0 - No Fibrosis	None	Micro	NO	No History of Primary Risk Factors	15049.1
TCGA-5R-AAAM	46	1	65	FEMALE	163	80	30.1103	WHITE	T2	N0	M0	Stage II	G2	32	6 - Established Cirrhosis	Severe	Micro	NO	No History of Primary Risk Factors	13173.8
TCGA-BC-4072	1490	1	74	FEMALE	Not Available	Not Available	NA	WHITE	T3	N0	M0	Stage IIIA	G3	Not Available	Not Available	Not Available	Macro	YES	No History of Primary Risk Factors	9623.73
TCGA-BC-A10Q	1135	1	72	FEMALE	Not Available	Not Available	NA	WHITE	T2	NX	MX	NA	Not Available	Not Available	Not Available	Not Available	None	YES	No History of Primary Risk Factors	14850
TCGA-BC-A10R	308	1	66	FEMALE	Not Available	Not Available	NA	WHITE	T3	NX	MX	NA	G2	27	Not Available	Mild	Micro	YES	No History of Primary Risk Factors	16576.1
TCGA-BC-A10X	770	1	52	FEMALE	Not Available	65	NA	WHITE	T3a	N0	MX	Stage IIIA	G2	264	Not Available	None	Micro	YES	No History of Primary Risk Factors	12357.6
TCGA-BC-A10Z	34	1	62	FEMALE	Not Available	79	NA	WHITE	T1	N0	MX	Stage I	G2	779	Not Available	None	None	YES	No History of Primary Risk Factors	16173
TCGA-BC-A110	2116	1	51	FEMALE	155	91	37.8772	BLACK OR AFRICAN AMERICAN	T1	NX	MX	NA	G1	Not Available	Not Available	Not Available	None	YES	Alcohol consumption	13763
TCGA-BC-A216	1351	0	62	FEMALE	164	151	56.1422	WHITE	T3	NX	M0	Stage IIIA	G2	831	0 - No Fibrosis	Mild	None	YES	No History of Primary Risk Factors	9083.7
TCGA-BC-A217	1397	1	75	FEMALE	163	81	30.4867	WHITE	T2	NX	M0	Stage II	G3	28	0 - No Fibrosis	None	Micro	NO	Alcohol consumption	11168.1
TCGA-BC-A3KF	8	0	66	FEMALE	173	58	19.3792	WHITE	T1	NX	M0	Stage I	G2	Not Available	Not Available	Not Available	None	YES	No History of Primary Risk Factors	13418.8
TCGA-BC-A3KG	680	0	68	FEMALE	159	64	25.3155	WHITE	T2	N0	M0	Stage II	G3	618	Not Available	Not Available	Micro	NO	Alcohol consumption	9132.48
TCGA-BC-A8YO	562	0	66	FEMALE	170	74	25.6055	WHITE	T4	N0	M0	Stage IIIC	G3	Not Available	Unknown	None	Macro	YES	Alcohol consumption;Other	11396.2
TCGA-BD-A3EP	409	0	75	FEMALE	168	71	25.1559	BLACK OR AFRICAN AMERICAN	T1	N0	M0	Stage I	G2	17	1,2 - Portal Fibrosis	Mild	None	NO	No History of Primary Risk Factors	11298.6
TCGA-BW-A5NP	0	0	26	FEMALE	Not Available	Not Available	NA	WHITE	T2	N0	M1	Stage IV	G3	143684	3,4 - Fibrous Speta	Mild	Micro	Unknown	Hepatitis B	11591.6
TCGA-CC-5259	250	0	60	FEMALE	153	49	20.9321	ASIAN	T4	N0	M0	Stage IIIC	G2	Not Available	Not Available	Not Available	Not Available	NO	No History of Primary Risk Factors	16635
TCGA-CC-5260	87	1	61	FEMALE	153	46	19.6506	ASIAN	T4	N0	M0	Stage IIIC	G1	Not Available	Not Available	Not Available	None	NO	Not Available	10538.7
TCGA-CC-A123	219	0	24	FEMALE	Not Available	Not Available	NA	ASIAN	T3	N0	M0	Stage IIIA	G1	Not Available	Not Available	Not Available	None	Not Available	Not Available	19297.7
TCGA-CC-A8HU	344	1	39	FEMALE	163	42	15.8079	ASIAN	T3	N0	M0	Stage IIIA	G3	Not Available	Not Available	Not Available	Unknown	NO	No History of Primary Risk Factors	12373.4
TCGA-CC-A8HV	279	1	51	FEMALE	159	51	20.1733	ASIAN	T2	N0	M0	Stage II	G2	Not Available	Not Available	Not Available	Unknown	NO	No History of Primary Risk Factors	7899.67
TCGA-CC-A9FU	0	0	52	FEMALE	153	48	20.5049	ASIAN	T3a	N0	M0	Stage IIIA	G2	Not Available	Not Available	Not Available	Unknown	NO	Hepatitis B	8879.86
TCGA-DD-A113	2425	0	55	FEMALE	154	56	23.6128	WHITE	T2	N0	M0	Stage II	G3	133	0 - No Fibrosis	None	Micro	Not Available	Other	11127.3
TCGA-DD-A118	3437	0	77	FEMALE	169	75	26.2596	WHITE	T2	N0	M0	Stage II	G2	85150	0 - No Fibrosis	None	None	NO	Not Available	11590.4
TCGA-DD-A11D	1560	1	57	FEMALE	163	73	27.4756	WHITE	T1	N0	M0	Stage I	G2	8	6 - Established Cirrhosis	None	None	YES	Non-Alcoholic Fatty Liver Disease	23509.5
TCGA-DD-A1EB	2017	0	72	FEMALE	164	57	21.1927	Not Available	T1	N0	M0	Stage I	G2	7	0 - No Fibrosis	None	None	YES	Other	14612.6
TCGA-DD-A1EC	602	0	20	FEMALE	157	50	20.2848	WHITE	T1	N0	M0	Stage I	G3	2	0 - No Fibrosis	None	None	NO	Not Available	12593.1
TCGA-DD-A1EF	394	1	57	FEMALE	164	81	30.116	WHITE	T1	N0	M0	Stage I	G3	16211	3,4 - Fibrous Speta	Mild	None	YES	No History of Primary Risk Factors	8210.45
TCGA-DD-A1EJ	1005	1	71	FEMALE	154	64	26.986	WHITE	T1	N1	M0	Stage IIIC	G2	18840	0 - No Fibrosis	Mild	None	YES	No History of Primary Risk Factors	15986.4
TCGA-DD-A1EK	558	1	64	FEMALE	159	97	38.3687	WHITE	T4	N0	M1	Stage IVB	G2	19	0 - No Fibrosis	Mild	None	YES	Other	12267.6
TCGA-DD-A39W	827	1	29	FEMALE	177	74	23.6203	WHITE	T3	N0	M0	Stage III	G2	Not Available	Not Available	Not Available	None	Not Available	No History of Primary Risk Factors	9516.74
TCGA-DD-A39X	1694	1	78	FEMALE	152	48	20.7756	WHITE	T1	NX	M0	Stage I	G2	10	0 - No Fibrosis	None	None	YES	No History of Primary Risk Factors	16974.5
TCGA-DD-A39Z	601	1	43	FEMALE	165	61	22.4059	Not Available	T2	NX	M0	Stage II	G2	Not Available	Not Available	Not Available	None	YES	Alcohol consumption	11956.9
TCGA-DD-A3A2	2131	1	76	FEMALE	178	85	26.8274	WHITE	T1	N0	M0	Stage I	G1	Not Available	0 - No Fibrosis	None	None	NO	No History of Primary Risk Factors	9234.74
TCGA-DD-A3A5	3125	1	66	FEMALE	170	58	20.0692	WHITE	T3	N0	M0	Stage III	G2	55	0 - No Fibrosis	None	None	NO	No History of Primary Risk Factors	13157.3
TCGA-DD-A3A6	3258	1	72	FEMALE	175	52	16.9796	WHITE	T2	N0	M0	Stage II	G2	Not Available	0 - No Fibrosis	None	Micro	NO	No History of Primary Risk Factors	17579.1
TCGA-DD-A3A9	931	1	64	FEMALE	168	62	21.9671	WHITE	T4	N0	M1	Stage IVB	G2	19930	0 - No Fibrosis	None	None	NO	Other	17658
TCGA-DD-A4NA	1008	0	67	FEMALE	166	93	33.7495	WHITE	T2	N1	M0	Stage IIIC	G3	3	5 - Nodular Formation and Incomplete Cirrhosis	None	Not Available	YES	No History of Primary Risk Factors	11380.9
TCGA-DD-A4ND	2746	0	56	FEMALE	162	89	33.9125	WHITE	T1	N0	M0	Stage I	G3	Not Available	0 - No Fibrosis	None	None	YES	No History of Primary Risk Factors	10673
TCGA-DD-A4NE	660	1	75	FEMALE	170	79	27.3356	WHITE	T3a	N0	M0	Stage IIIA	G3	28	0 - No Fibrosis	None	None	YES	No History of Primary Risk Factors	16581.7
TCGA-DD-A4NH	917	0	65	FEMALE	157	81	32.8614	WHITE	T3b	N0	M0	Stage IIIB	G3	92889	1,2 - Portal Fibrosis	None	Macro	YES	Alcohol consumption	12559.8
TCGA-DD-A4NJ	928	0	54	FEMALE	164	88	32.7186	WHITE	T2	N0	M0	Stage II	G2	5	1,2 - Portal Fibrosis	Mild	None	YES	Non-Alcoholic Fatty Liver Disease	14510.8
TCGA-DD-A4NK	1210	1	80	FEMALE	Not Available	84	NA	WHITE	T3	N0	M0	Stage IIIA	G2	3	0 - No Fibrosis	None	None	YES	No History of Primary Risk Factors	8718.52
TCGA-DD-A4NN	899	1	56	FEMALE	163	59	22.2063	WHITE	T1	N0	M0	Stage I	G3	4223	0 - No Fibrosis	Unknown	None	YES	No History of Primary Risk Factors	10872.4
TCGA-DD-A4NR	9	1	85	FEMALE	64	54	131.836	WHITE	T1	N0	M0	Stage I	G3	40250	6 - Established Cirrhosis	Unknown	None	YES	Other	13006.7
TCGA-DD-A4NS	2456	1	61	FEMALE	167	58	20.7967	WHITE	T1	N0	M0	Stage I	G2	2	0 - No Fibrosis	None	None	YES	Alcohol consumption	10944.4
TCGA-DD-A73B	283	1	72	FEMALE	154	74	31.2026	WHITE	T1	N0	M0	Stage I	G2	30	6 - Established Cirrhosis	Unknown	None	YES	Alpha-1 Antitrypsin Deficiency;Other	18585.8
TCGA-DD-A73C	701	0	65	FEMALE	159	49	19.3821	WHITE	T3a	N0	M0	Stage IIIA	G1	3	0 - No Fibrosis	None	None	YES	No History of Primary Risk Factors	13255.8
TCGA-DD-A73D	693	0	68	FEMALE	170	102	35.2941	WHITE	T2	NX	MX	Stage II	G1	4	6 - Established Cirrhosis	Mild	Micro	YES	Hepatitis C	9638.46
TCGA-DD-A73F	1085	0	77	FEMALE	164	69	25.6544	WHITE	T1	N0	M0	Stage I	G1	283	0 - No Fibrosis	None	None	YES	No History of Primary Risk Factors	12919.6
TCGA-DD-A73G	3478	0	73	FEMALE	155	44	18.3143	WHITE	T1	N0	M0	Stage I	G3	2035400	0 - No Fibrosis	None	None	YES	No History of Primary Risk Factors	10708.8
TCGA-DD-AA3A	410	1	81	FEMALE	151	60	26.3146	WHITE	T1	N0	MX	Stage I	G4	1	0 - No Fibrosis	None	None	YES	No History of Primary Risk Factors	7373.01
TCGA-DD-AACB	2324	0	74	FEMALE	156	72	29.5858	ASIAN	T1	N0	M0	Stage I	G3	1902	6 - Established Cirrhosis	Mild	Micro	NO	Hepatitis B	15467.6
TCGA-DD-AACL	107	1	66	FEMALE	150	69	30.6667	ASIAN	T1	N0	M0	Stage I	G3	1368	Unknown	Unknown	None	NO	Hepatitis C	15093.7
TCGA-DD-AACT	1562	0	69	FEMALE	158	62	24.8358	ASIAN	T1	N0	M0	Stage I	G2	4	Unknown	Mild	None	NO	Hepatitis B	11145.2
TCGA-DD-AACZ	171	1	63	FEMALE	149	52	23.4224	ASIAN	T1	N0	M0	Stage I	G4	25	Unknown	Unknown	Macro	NO	Unknown	23687.6
TCGA-DD-AAD0	137	0	73	FEMALE	150	54	24	ASIAN	T1	N0	M0	Stage I	G2	4	Unknown	Mild	None	NO	Hepatitis B	25520.2
TCGA-DD-AAD1	564	0	51	FEMALE	161	44	16.9747	ASIAN	T1	N0	M0	Stage I	G4	451	Unknown	Unknown	None	NO	Hepatitis B;Hepatitis C	12018.4
TCGA-DD-AAD8	1219	0	73	FEMALE	152	57	24.6711	ASIAN	T1	N0	M0	Stage I	G2	4	1,2 - Portal Fibrosis	Mild	None	NO	Hepatitis B;Hepatitis C	9108.87
TCGA-DD-AADA	1233	0	66	FEMALE	147	59	27.3034	ASIAN	T1	N0	M0	Stage I	G3	8698	Unknown	Unknown	Macro	NO	Hepatitis B	13987.8
TCGA-DD-AADF	115	1	64	FEMALE	145	55	26.1593	ASIAN	T1	N0	M0	Stage I	G4	725	Unknown	Unknown	None	NO	Hepatitis B	12549.3
TCGA-DD-AADI	1085	0	43	FEMALE	165	64	23.5078	ASIAN	T1	N0	M0	Stage I	G3	27	Unknown	Unknown	None	NO	Hepatitis B	16162
TCGA-DD-AADJ	1066	0	70	FEMALE	154	59	24.8777	ASIAN	T1	N0	M0	Stage I	G3	708	Unknown	Unknown	None	NO	Unknown	13316.6
TCGA-DD-AADK	1049	0	68	FEMALE	150	51	22.6667	ASIAN	T2	N0	M0	Stage II	G3	236	6 - Established Cirrhosis	None	Micro	NO	Hepatitis B	11073.5
TCGA-DD-AADY	555	0	55	FEMALE	161	55	21.2183	ASIAN	T1	N0	M0	Stage I	G2	9	6 - Established Cirrhosis	None	None	NO	Hepatitis B	11994.8
TCGA-DD-AAE0	555	0	45	FEMALE	159	56	22.151	ASIAN	T3a	N0	M0	Stage IIIA	G4	8751	3,4 - Fibrous Speta	Mild	None	NO	Hepatitis B	10541.8
TCGA-DD-AAE4	608	0	49	FEMALE	157	62	25.1532	ASIAN	T1	N0	M0	Stage I	G1	7	6 - Established Cirrhosis	None	None	NO	Hepatitis B	15497.1
TCGA-DD-AAE6	141	0	59	FEMALE	159	46	18.1955	ASIAN	T1	N0	M0	Stage I	G2	113	6 - Established Cirrhosis	None	Micro	NO	Unknown	15868.8
TCGA-DD-AAEG	719	0	59	FEMALE	149	40	18.0172	ASIAN	T1	N0	M0	Stage I	G3	1	6 - Established Cirrhosis	None	None	NO	No History of Primary Risk Factors	11080.7
TCGA-ED-A5KG	854	0	60	FEMALE	160	61	23.8281	ASIAN	T2	N0	M0	Stage II	G2	3177	Not Available	Severe	Micro	NO	No History of Primary Risk Factors	11556.3
TCGA-ED-A66Y	296	1	51	FEMALE	160	59	23.0469	ASIAN	T3a	N0	M0	Stage IIIA	G3	12100	Not Available	Mild	Micro	NO	No History of Primary Risk Factors	10619.8
TCGA-ED-A7PX	6	0	48	FEMALE	161	43	16.5889	ASIAN	T2	NX	M0	Stage II	G3	24	Not Available	None	Micro	NO	No History of Primary Risk Factors	11808.9
TCGA-ED-A7PY	390	0	20	FEMALE	156	40	16.4366	ASIAN	T2	NX	M0	Stage II	G3	2	Not Available	Mild	Micro	NO	No History of Primary Risk Factors	8185.6
TCGA-ED-A7XP	400	0	53	FEMALE	157	54	21.9076	ASIAN	T2	N0	M0	Stage II	G3	18	Not Available	Mild	Micro	NO	No History of Primary Risk Factors	13831.1
TCGA-ED-A82E	408	0	60	FEMALE	150	44	19.5556	ASIAN	T3a	N0	M0	Stage IIIA	G2	4	Not Available	Mild	Micro	NO	No History of Primary Risk Factors	10101.9
TCGA-ED-A8O5	406	0	59	FEMALE	165	63	23.1405	ASIAN	T3a	N0	M0	Stage IIIA	G3	498	Not Available	Mild	Micro	NO	No History of Primary Risk Factors	13226.5
TCGA-ED-A8O6	56	1	50	FEMALE	165	45	16.5289	ASIAN	T3a	N0	M0	Stage IIIA	G3	3000	Not Available	Mild	Micro	NO	No History of Primary Risk Factors	14248.4
TCGA-EP-A2KA	627	1	52	FEMALE	178	Not Available	NA	WHITE	T3a	NX	MX	Stage IIIA	G3	13	1,2 - Portal Fibrosis	Not Available	Not Available	YES	No History of Primary Risk Factors	11801.4
TCGA-EP-A2KB	596	1	46	FEMALE	165	81	29.7521	WHITE	T1	NX	MX	Stage I	G2	2128	Not Available	Not Available	None	NO	Hepatitis C	12946.7
TCGA-FV-A23B	1852	1	70	FEMALE	Not Available	Not Available	NA	WHITE	T2	N0	M0	Stage II	Not Available	Not Available	Not Available	Not Available	Not Available	Not Available	Hepatitis C	11554.2
TCGA-FV-A3I0	848	0	76	FEMALE	Not Available	Not Available	NA	WHITE	T2	NX	M0	Stage II	G2	Not Available	Not Available	Not Available	Micro	Not Available	No History of Primary Risk Factors	12251.7
TCGA-FV-A3I1	247	1	81	FEMALE	Not Available	Not Available	NA	WHITE	T2	N0	MX	Stage II	G2	Not Available	0 - No Fibrosis	Not Available	Micro	NO	Alcohol consumption	13822.2
TCGA-FV-A3R3	366	1	38	FEMALE	161	97	37.4214	WHITE	T1	NX	MX	Stage I	G2	Not Available	Not Available	Not Available	None	NO	No History of Primary Risk Factors	12512.7
TCGA-FV-A495	1	0	51	FEMALE	172	70	23.6614	WHITE	T2	NX	M0	Stage II	G2	39	3,4 - Fibrous Speta	Mild	None	YES	Hepatitis C	13495.2
TCGA-FV-A496	10	0	84	FEMALE	162	54	20.5761	WHITE	T1	NX	M0	Stage I	G2	67	0 - No Fibrosis	None	None	YES	No History of Primary Risk Factors	14165
TCGA-G3-A25T	1553	0	45	FEMALE	167	64	22.9481	WHITE	T3	N0	M0	Stage IIIA	G2	7	0 - No Fibrosis	None	None	NO	Hepatitis C	12602.3
TCGA-G3-A25U	1636	0	63	FEMALE	153	47	20.0777	ASIAN	T1	N0	M0	Stage I	G3	10	0 - No Fibrosis	Mild	None	NO	Hepatitis B	13480.1
TCGA-G3-A25Y	452	1	52	FEMALE	158	57	22.8329	ASIAN	T1	N0	M0	Stage I	G3	35	3,4 - Fibrous Speta	Mild	None	NO	Hepatitis B	15059.3
TCGA-G3-A7M6	632	0	60	FEMALE	158	77	30.8444	WHITE	T1	NX	MX	Stage I	G3	24	1,2 - Portal Fibrosis	Mild	None	Unknown	Hepatitis C	11749.5
TCGA-G3-AAV3	412	0	58	FEMALE	168	85	30.1162	WHITE	T2	N0	M0	Stage II	G2	5	6 - Established Cirrhosis	Severe	None	YES	Alcohol consumption;Hepatitis C;Non-Alcoholic Fatty Liver Disease	13494.4
TCGA-G3-AAV4	27	1	83	FEMALE	156	56	23.0112	WHITE	T1	N0	M0	Stage I	G1	4	3,4 - Fibrous Speta	Not Available	None	YES	Hepatitis B	13383.3
TCGA-G3-AAV6	65	1	53	FEMALE	165	78	28.6501	WHITE	T3a	N0	M0	Stage IIIA	G3	57875	0 - No Fibrosis	Severe	Micro	Unknown	No History of Primary Risk Factors	13603.3
TCGA-GJ-A6C0	31	1	75	FEMALE	160	90	35.1562	WHITE	T2	NX	MX	Stage II	G2	Not Available	Unknown	Unknown	Micro	YES	No History of Primary Risk Factors	13814.2
TCGA-HP-A5N0	752	1	90	FEMALE	156	65	26.7094	Not Evaluated	TX	NX	M0	NA	Not Available	Not Available	0 - No Fibrosis	None	Unknown	YES	No History of Primary Risk Factors	12656.2
TCGA-KR-A7K7	951	0	61	FEMALE	168	125	44.2885	WHITE	T2	N0	M0	Stage II	G1	308836	Not Available	Not Available	Micro	Unknown	No History of Primary Risk Factors	10693
TCGA-LG-A6GG	387	0	79	FEMALE	158	65	26.0375	WHITE	T2	NX	M0	Stage II	G2	Not Available	Unknown	None	Micro	Unknown	Other	9726.4
TCGA-PD-A5DF	639	1	58	FEMALE	167	72	25.8166	WHITE	T4	N0	M0	Stage IIIB	G2	Not Available	Not Available	Not Available	Not Available	YES	No History of Primary Risk Factors	15478.4
TCGA-RC-A6M4	22	0	74	FEMALE	Not Available	87	NA	WHITE	T3	NX	MX	Stage IIIA	G2	5	Not Available	Not Available	None	YES	No History of Primary Risk Factors	15605.3
TCGA-RC-A6M5	15	0	20	FEMALE	Not Available	Not Available	NA	WHITE	T1	N1	M0	Stage IVA	G2	Not Available	Not Available	Not Available	None	NO	No History of Primary Risk Factors	12963.2
TCGA-RC-A7S9	640	0	47	FEMALE	161	58	22.3757	ASIAN	T1	N0	M0	Stage I	G3	10	6 - Established Cirrhosis	Mild	None	Unknown	Hepatitis B	13094.4
TCGA-UB-A7MA	848	0	62	FEMALE	165	85	31.2213	WHITE	T2b	N0	M0	Stage II	G2	2008	0 - No Fibrosis	None	Micro	NO	No History of Primary Risk Factors	12731.1
TCGA-UB-AA0V	314	0	69	FEMALE	175	57	18.6122	WHITE	NA	NX	MX	Stage I	G1	3	0 - No Fibrosis	Mild	None	YES	Hemochromatosis	10771.3
TCGA-WJ-A86L	345	0	68	FEMALE	159	56	22.151	WHITE	T1	NX	MX	Stage I	G2	16	0 - No Fibrosis	None	None	NO	No History of Primary Risk Factors	3833.41
TCGA-WQ-A9G7	30	0	71	FEMALE	157	69	27.993	WHITE	T3a	NX	M0	NA	G3	Not Available	Unknown	Unknown	None	NO	No History of Primary Risk Factors	10129.7
TCGA-WX-AA44	615	0	64	FEMALE	152	61	26.4024	WHITE	T1	NX	MX	Stage I	G3	48	6 - Established Cirrhosis	None	None	NO	Non-Alcoholic Fatty Liver Disease	10100
TCGA-WX-AA47	556	1	33	FEMALE	168	63	22.3214	WHITE	T3a	NX	MX	Stage IIIA	G2	1	0 - No Fibrosis	Mild	Macro	NO	No History of Primary Risk Factors	9010.41
TCGA-XR-A8TC	1339	0	43	FEMALE	155	52	21.6441	WHITE	T1	NX	MX	Stage I	G2	47	6 - Established Cirrhosis	Mild	None	NO	Hepatitis B	12288.4
TCGA-XR-A8TD	1030	0	49	FEMALE	156	69	28.3531	WHITE	T3	N0	M0	Stage IIIB	G3	188	0 - No Fibrosis	None	None	Unknown	No History of Primary Risk Factors	15406.5
TCGA-ZP-A9CY	782	0	66	FEMALE	152	83	35.9245	WHITE	T1	NX	MX	NA	G1	Not Available	6 - Established Cirrhosis	Mild	None	YES	Non-Alcoholic Fatty Liver Disease	13096.2
TCGA-ZP-A9D0	1091	0	67	FEMALE	165	78	28.6501	BLACK OR AFRICAN AMERICAN	T1	NX	MX	NA	G1	Not Available	0 - No Fibrosis	Mild	None	NO	Non-Alcoholic Fatty Liver Disease	9177.87
TCGA-ZP-A9D1	21	0	56	FEMALE	170	130	44.9827	WHITE	T1	NX	MX	NA	G2	8	5 - Nodular Formation and Incomplete Cirrhosis	Not Available	None	YES	Non-Alcoholic Fatty Liver Disease	9417.78
TCGA-ZP-A9D4	395	0	64	FEMALE	155	55	22.8928	WHITE	T1	NX	MX	NA	G1	2	0 - No Fibrosis	Mild	None	NO	No History of Primary Risk Factors	10857.9
TCGA-ZS-A9CE	1241	0	79	FEMALE	Not Available	Not Available	NA	WHITE	T2	NX	MX	Stage II	G1	Not Available	0 - No Fibrosis	None	Micro	Unknown	Unknown	7832.13
TCGA-2V-A95S	NA	NA	Not Available	MALE	173	78	26.0617	ASIAN	T2	NX	MX	Stage II	G3	10793	6 - Established Cirrhosis	Severe	Micro	NO	Other	14830.6
TCGA-2Y-A9GS	724	1	58	MALE	162	92	35.0556	WHITE	T2	NX	MX	NA	G2	74	Unknown	None	Unknown	Unknown	Alcohol consumption	14397.4
TCGA-2Y-A9GT	1624	1	51	MALE	182	122	36.8313	WHITE	T1	NX	MX	Stage I	G2	17	Unknown	None	None	YES	Alcohol consumption;Hepatitis B;Hepatitis C	11725.6
TCGA-2Y-A9GW	1271	1	64	MALE	182	139	41.9635	WHITE	T1	N0	MX	Stage I	G2	2	Unknown	None	Unknown	YES	Alcohol consumption	13370.7
TCGA-2Y-A9GX	2442	0	68	MALE	175	104	33.9592	WHITE	T1	NX	MX	Stage I	G2	1	Unknown	None	Unknown	NO	Alcohol consumption	12842.6
TCGA-2Y-A9H0	3675	0	49	MALE	180	89	27.4691	WHITE	T3	N0	M0	Stage IIIA	G1	7598	Unknown	None	Unknown	Not Available	Alcohol consumption;Hepatitis B;Hepatitis C	21515.7
TCGA-2Y-A9H1	1229	1	58	MALE	171	89	30.4367	WHITE	T1	NX	MX	Stage I	G2	3	1,2 - Portal Fibrosis	Unknown	Unknown	NO	Alcohol consumption;Hepatitis C	11402.3
TCGA-2Y-A9H3	1516	0	45	MALE	179	105	32.7705	WHITE	T2	NX	MX	Stage II	G1	5640	1,2 - Portal Fibrosis	None	Micro	YES	Alcohol consumption;Non-Alcoholic Fatty Liver Disease	6979.89
TCGA-2Y-A9H4	1452	0	68	MALE	167	61	21.8724	BLACK OR AFRICAN AMERICAN	T1	N0	MX	Stage I	G2	11	Unknown	Unknown	None	YES	Alcohol consumption;Hepatitis B	11073.9
TCGA-2Y-A9H9	697	0	70	MALE	178	88	27.7743	WHITE	T1	N0	MX	Stage I	G2	12	Unknown	None	Unknown	YES	Alcohol consumption;Hepatitis C	11806.6
TCGA-2Y-A9HA	36	1	70	MALE	169	69	24.1588	WHITE	T2	NX	MX	Stage II	G2	114	3,4 - Fibrous Speta	None	Unknown	NO	Alcohol consumption;Hepatitis C	13674.6
TCGA-2Y-A9HB	260	0	66	MALE	167	74	26.5338	Not Evaluated	T1	NX	MX	Stage I	G2	21	Unknown	None	None	NO	Alcohol consumption	13688.8
TCGA-3K-AAZ8	396	0	65	MALE	172	84	28.3937	BLACK OR AFRICAN AMERICAN	T3b	NX	MX	Stage IIIB	G1	Not Available	5 - Nodular Formation and Incomplete Cirrhosis	Not Available	Not Available	NO	Hepatitis C	12148.4
TCGA-4R-AA8I	262	1	66	MALE	171	103	35.2245	WHITE	T2	NX	MX	Stage II	G2	5	6 - Established Cirrhosis	None	Micro	NO	Non-Alcoholic Fatty Liver Disease	9986.48
TCGA-5C-A9VG	328	0	58	MALE	170	73	25.2595	WHITE	T2	N0	M0	Stage II	G2	Not Available	Not Available	None	Micro	NO	Other	11464.1
TCGA-5C-A9VH	322	0	70	MALE	165	69	25.3444	WHITE	T1	N0	M0	Stage I	G2	Not Available	Not Available	None	None	NO	No History of Primary Risk Factors	12334.9
TCGA-5C-AAPD	20	0	61	MALE	172	69	23.3234	ASIAN	T2	N0	M0	Stage II	G1	Not Available	Not Available	None	None	NO	Hepatitis B	11519.9
TCGA-5R-AA1C	520	0	57	MALE	174	90	29.7265	WHITE	T2	N0	M0	Stage II	G2	2	1,2 - Portal Fibrosis	None	Micro	NO	No History of Primary Risk Factors	21913.7
TCGA-BC-4073	849	0	73	MALE	Not Available	Not Available	NA	WHITE	T3	N0	MX	Stage IIIA	G3	Not Available	Not Available	Not Available	Macro	YES	Hemochromatosis	16674.7
TCGA-BC-A10S	1423	1	81	MALE	Not Available	74	NA	WHITE	T3	NX	MX	NA	G1	Not Available	Not Available	None	Micro	NO	Alcohol consumption	14618.3
TCGA-BC-A10T	837	1	76	MALE	Not Available	86	NA	WHITE	T4	NX	MX	NA	G1	Not Available	1,2 - Portal Fibrosis	Not Available	None	NO	No History of Primary Risk Factors	12978.7
TCGA-BC-A10U	837	1	69	MALE	Not Available	Not Available	NA	WHITE	T2	NX	MX	NA	G2	38	Not Available	Not Available	Not Available	YES	Alcohol consumption	11492.6
TCGA-BC-A10W	91	1	50	MALE	Not Available	71	NA	ASIAN	T4	NX	MX	NA	G3	79	Not Available	Not Available	Not Available	YES	Hepatitis B	13264.2
TCGA-BC-A10Y	711	1	76	MALE	175	77	25.1429	WHITE	T4	NX	MX	NA	G3	10575	Not Available	None	Micro	NO	Alcohol consumption	13820.7
TCGA-BC-A112	153	1	80	MALE	165	97	35.629	WHITE	T3	NX	MX	NA	G2	233	0 - No Fibrosis	Not Available	None	NO	Alcohol consumption	11870.5
TCGA-BC-A5W4	547	1	69	MALE	183	106	31.6522	WHITE	T3a	NX	M0	Stage IIIA	G3	Not Available	Not Available	None	Micro	NO	Alcohol consumption	13100.3
TCGA-BC-A69H	444	0	64	MALE	173	70	23.3887	WHITE	T2	NX	M0	Stage II	G3	103900	Not Available	None	Micro	NO	Alcohol consumption	19127.9
TCGA-BC-A69I	387	0	69	MALE	180	95	29.321	WHITE	T1	N0	M0	Stage I	G1	2	Not Available	None	None	YES	No History of Primary Risk Factors	13885.1
TCGA-BD-A2L6	1363	0	69	MALE	168	110	38.9739	WHITE	T2	NX	MX	NA	G2	53	3,4 - Fibrous Speta	None	Micro	Not Available	Alcohol consumption	11022.9
TCGA-BD-A3ER	1115	0	62	MALE	188	111	31.4056	WHITE	T2	NX	MX	Stage II	G2	5	6 - Established Cirrhosis	Mild	None	NO	Hemochromatosis	13268.3
TCGA-BW-A5NO	20	0	50	MALE	Not Available	Not Available	NA	BLACK OR AFRICAN AMERICAN	T3a	NX	MX	Stage IIIA	G2	Not Available	3,4 - Fibrous Speta	Unknown	None	Unknown	Hepatitis C	14315.3
TCGA-BW-A5NQ	0	0	63	MALE	Not Available	Not Available	NA	WHITE	T1	NX	MX	Stage I	G3	Not Available	6 - Established Cirrhosis	Unknown	None	Unknown	Alcohol consumption;Other	22859.1
TCGA-CC-5258	129	1	48	MALE	Not Available	55	NA	ASIAN	T2	N0	M0	Stage II	G2	Not Available	Not Available	Not Available	None	NO	Not Available	23255.3
TCGA-CC-5261	97	1	44	MALE	175	58	18.9388	ASIAN	T2	N0	M0	Stage II	G2	Not Available	Not Available	Not Available	None	Not Available	Not Available	13425.1
TCGA-CC-5262	103	1	67	MALE	170	62	21.4533	ASIAN	T4	N0	M0	Stage IIIC	G1	Not Available	Not Available	Not Available	Not Available	NO	No History of Primary Risk Factors	17294.9
TCGA-CC-5263	129	1	35	MALE	163	59	22.2063	ASIAN	T3	N0	M0	Stage IIIA	G1	Not Available	Not Available	Not Available	None	NO	No History of Primary Risk Factors	9950.2
TCGA-CC-5264	102	1	71	MALE	160	52	20.3125	ASIAN	T3	N0	M0	Stage IIIA	G2	Not Available	Not Available	Not Available	None	Not Available	Not Available	20216.3
TCGA-CC-A1HT	101	1	50	MALE	163	54	20.3244	ASIAN	T3	N0	M0	Stage IIIA	G3	Not Available	Not Available	Not Available	Not Available	NO	No History of Primary Risk Factors	20967.9
TCGA-CC-A3M9	300	1	45	MALE	174	61	20.148	ASIAN	T3	N0	M0	Stage IIIA	G3	Not Available	Not Available	Not Available	Not Available	NO	Alcohol consumption	30445.4
TCGA-CC-A3MA	303	1	61	MALE	168	66	23.3844	ASIAN	T3	N0	M0	Stage IIIA	G2	Not Available	Not Available	Not Available	Not Available	NO	Alcohol consumption	10982.4
TCGA-CC-A3MB	315	1	36	MALE	176	58	18.7242	ASIAN	T3	N0	M0	Stage IIIA	G1	Not Available	Not Available	Not Available	Not Available	NO	No History of Primary Risk Factors	9729.34
TCGA-CC-A3MC	363	0	54	MALE	163	52	19.5717	ASIAN	T3	N0	M0	Stage IIIA	G2	Not Available	Not Available	Not Available	Not Available	NO	Alcohol consumption	14990.4
TCGA-CC-A5UC	347	1	63	MALE	165	57	20.9366	ASIAN	T3	N0	M0	Stage IIIA	G3	Not Available	Not Available	Not Available	Unknown	NO	Alcohol consumption	17643.6
TCGA-CC-A5UD	304	1	45	MALE	170	62	21.4533	ASIAN	T3	N0	M0	Stage IIIA	G2	Not Available	Not Available	Not Available	Unknown	NO	Alcohol consumption	20283.2
TCGA-CC-A5UE	272	1	48	MALE	175	65	21.2245	ASIAN	T4	N0	M0	Stage IIIB	G2	Not Available	Not Available	Not Available	Unknown	NO	Alcohol consumption	12104.8
TCGA-CC-A7IE	217	1	57	MALE	172	62	20.9573	ASIAN	T3	N0	M0	Stage IIIA	G2	Not Available	Not Available	Not Available	Unknown	NO	Alcohol consumption	11076.7
TCGA-CC-A7IF	649	1	59	MALE	169	58	20.3074	ASIAN	T3	N0	M0	Stage IIIA	G1	Not Available	Not Available	Not Available	Unknown	NO	Alcohol consumption	12621.4
TCGA-CC-A7IG	299	1	47	MALE	174	62	20.4783	ASIAN	T2	N0	M0	Stage II	G2	Not Available	Not Available	Not Available	Unknown	NO	Alcohol consumption	17142.6
TCGA-CC-A7IH	365	0	58	MALE	175	56	18.2857	ASIAN	T3	N0	M0	Stage IIIA	G1	Not Available	Not Available	Not Available	Unknown	NO	Alcohol consumption	20240.9
TCGA-CC-A7II	399	0	54	MALE	168	52	18.424	ASIAN	T3	N0	M0	Stage IIIA	G3	Not Available	Not Available	Not Available	Unknown	NO	Alcohol consumption	14023.3
TCGA-CC-A7IJ	382	0	56	MALE	165	54	19.8347	ASIAN	T2	N0	M0	Stage II	G3	Not Available	Not Available	Not Available	Unknown	NO	Alcohol consumption	12709.6
TCGA-CC-A7IK	262	1	59	MALE	168	57	20.1956	ASIAN	T3	N0	M0	Stage IIIA	G3	Not Available	Not Available	Not Available	Unknown	NO	Alcohol consumption	22790.8
TCGA-CC-A7IL	278	1	61	MALE	174	63	20.8086	ASIAN	T3	N0	M0	Stage IIIA	G1	Not Available	Not Available	Not Available	Unknown	NO	Alcohol consumption	16652.5
TCGA-CC-A8HS	300	1	18	MALE	172	62	20.9573	ASIAN	T3	N1	M0	Stage IIIC	G1	Not Available	Not Available	Not Available	Unknown	NO	No History of Primary Risk Factors	9319.07
TCGA-CC-A8HT	140	1	74	MALE	159	48	18.9866	ASIAN	T3	N0	M0	Stage IIIA	G2	Not Available	Not Available	Not Available	Unknown	NO	Alcohol consumption	10448.7
TCGA-CC-A9FS	211	0	55	MALE	174	72	23.7812	ASIAN	T2	N0	M0	Stage II	G2	Not Available	Not Available	Not Available	Unknown	NO	Alcohol consumption	10673.3
TCGA-CC-A9FV	0	0	57	MALE	165	59	21.6713	ASIAN	T3	N0	M0	Stage IIIA	G2	Not Available	Not Available	Not Available	Unknown	NO	Alcohol consumption	18535.8
TCGA-CC-A9FW	248	0	68	MALE	175	67	21.8776	ASIAN	T3	N0	M0	Stage IIIA	G2	Not Available	Not Available	Not Available	Unknown	NO	Alcohol consumption	7464.72
TCGA-DD-A114	1149	1	42	MALE	173	74	24.7252	BLACK OR AFRICAN AMERICAN	T2	NA	M0	Stage II	G3	21	5 - Nodular Formation and Incomplete Cirrhosis	Mild	Micro	NO	Hepatitis C	19563.6
TCGA-DD-A115	2542	1	53	MALE	168	79	27.9904	WHITE	T3	N0	M0	Stage IIIA	G2	10	0 - No Fibrosis	None	None	NO	Alcohol consumption	15368.1
TCGA-DD-A116	1622	1	68	MALE	175	73	23.8367	ASIAN	T3	N0	M0	Stage IIIA	G3	24	3,4 - Fibrous Speta	Not Available	Not Available	NO	Hepatitis B	15864.2
TCGA-DD-A119	223	1	40	MALE	160	58	22.6562	ASIAN	T3a	N0	M1	Stage IV	G3	1836	0 - No Fibrosis	None	Micro	YES	Hepatitis B	19287.4
TCGA-DD-A11A	79	0	67	MALE	156	67	27.5312	BLACK OR AFRICAN AMERICAN	T1	N0	M0	Stage I	G3	223	0 - No Fibrosis	None	None	NO	Other	12046.8
TCGA-DD-A11B	14	1	73	MALE	181	134	40.9023	WHITE	T1	N0	M0	Stage I	G2	15	6 - Established Cirrhosis	Mild	None	NO	Non-Alcoholic Fatty Liver Disease	14509
TCGA-DD-A11C	662	0	69	MALE	186	123	35.5532	WHITE	T1	N0	M0	Stage I	G3	11	0 - No Fibrosis	None	None	YES	Not Available	16672.7
TCGA-DD-A1EA	2415	0	68	MALE	168	94	33.305	ASIAN	T2	N0	M0	Stage II	G2	3	1,2 - Portal Fibrosis	Mild	Micro	YES	Hepatitis B	14176.6
TCGA-DD-A1ED	2301	0	68	MALE	168	85	30.1162	WHITE	T1	N0	M0	Stage I	G1	3	0 - No Fibrosis	None	None	NO	Alcohol consumption	11810.6
TCGA-DD-A1EE	349	1	73	MALE	175	77	25.1429	WHITE	T3	N0	M0	Stage IIIA	G3	3	6 - Established Cirrhosis	Severe	None	NO	Hepatitis C	13000.8
TCGA-DD-A1EG	1372	1	76	MALE	168	82	29.0533	WHITE	T1	N0	M0	Stage I	G3	16	1,2 - Portal Fibrosis	Mild	None	YES	Alcohol consumption;Non-Alcoholic Fatty Liver Disease	19935.5
TCGA-DD-A1EH	1495	0	23	MALE	179	70	21.847	WHITE	T3	N0	M0	Stage III	G3	94340	3,4 - Fibrous Speta	None	Macro	YES	Hepatitis B	16635.4
TCGA-DD-A1EI	183	0	46	MALE	175	69	22.5306	ASIAN	T1	N0	M0	Stage I	G2	24	6 - Established Cirrhosis	Mild	None	NO	Hepatitis B	14249.6
TCGA-DD-A1EL	415	1	23	MALE	182	54	16.3024	BLACK OR AFRICAN AMERICAN	T2	N0	M0	Stage II	G3	5	0 - No Fibrosis	Mild	None	NO	Hepatitis B	19382.6
TCGA-DD-A39V	643	1	77	MALE	174	79	26.0933	WHITE	T2	NX	M0	Stage II	G3	Not Available	0 - No Fibrosis	None	None	YES	No History of Primary Risk Factors	15768.6
TCGA-DD-A39Y	171	1	67	MALE	176	85	27.4406	ASIAN	T1	NX	M0	Stage I	G3	5600	0 - No Fibrosis	None	None	YES	No History of Primary Risk Factors	23101.7
TCGA-DD-A3A1	233	1	65	MALE	185	78	22.7904	Not Available	T3b	N0	M0	Stage IIIA	G2	6	0 - No Fibrosis	None	Macro	YES	No History of Primary Risk Factors	13797.3
TCGA-DD-A3A3	535	1	45	MALE	167	71	25.4581	ASIAN	T1	N0	M0	Stage I	G2	6	0 - No Fibrosis	None	Macro	NO	No History of Primary Risk Factors	13045.7
TCGA-DD-A3A4	612	1	37	MALE	189	65	18.1966	WHITE	T3	N0	M0	Stage IIIA	G3	Not Available	0 - No Fibrosis	None	None	YES	Other	21018
TCGA-DD-A3A7	419	1	67	MALE	188	80	22.6347	Unknown	T3b	N0	M0	Stage IIIB	G3	120	0 - No Fibrosis	Mild	Micro	YES	Alcohol consumption;Other	8950.08
TCGA-DD-A3A8	11	1	75	MALE	177	99	31.6001	WHITE	T2	N0	M0	Stage II	G2	4	0 - No Fibrosis	None	None	YES	No History of Primary Risk Factors	17544.8
TCGA-DD-A4NB	989	0	25	MALE	185	69	20.1607	WHITE	T1	N0	M0	Stage I	G2	3	Unknown	Mild	None	YES	No History of Primary Risk Factors	16850.2
TCGA-DD-A4NF	942	0	72	MALE	173	86	28.7347	WHITE	T1	N0	M0	Stage I	G2	6	6 - Established Cirrhosis	Mild	None	NO	Hepatitis C	17577.6
TCGA-DD-A4NG	802	1	77	MALE	164	94	34.9494	WHITE	T3a	NX	M0	Stage IIIA	G2	3	Unknown	None	Micro	YES	Alcohol consumption	10898.3
TCGA-DD-A4NI	816	0	67	MALE	172	99	33.464	WHITE	T2	NX	M0	Stage II	G2	6	0 - No Fibrosis	Unknown	None	YES	Alcohol consumption;Non-Alcoholic Fatty Liver Disease	10799.7
TCGA-DD-A4NL	1711	0	46	MALE	173	113	37.756	WHITE	T1	N0	M0	Stage I	G1	2	0 - No Fibrosis	None	None	NO	Alcohol consumption;Other	9087.22
TCGA-DD-A4NO	2245	0	65	MALE	176	109	35.1885	WHITE	T1	N0	M0	Stage I	G1	3	0 - No Fibrosis	Mild	None	NO	Hepatitis C;Other	9225.41
TCGA-DD-A4NP	3308	0	32	MALE	177	79	25.2163	WHITE	T1	N0	M0	Stage I	G3	2	0 - No Fibrosis	None	None	NO	No History of Primary Risk Factors	11154.8
TCGA-DD-A4NQ	373	1	60	MALE	159	75	29.6665	WHITE	T2	N0	M0	Stage II	G3	141	Unknown	Mild	Macro	YES	Hepatitis B;Other	14518.7
TCGA-DD-A4NV	2398	0	61	MALE	179	129	40.2609	WHITE	T3	N0	M0	Stage IIIA	G1	3	0 - No Fibrosis	None	None	YES	Non-Alcoholic Fatty Liver Disease;Other	13223.5
TCGA-DD-A73A	728	0	71	MALE	174	102	33.6901	WHITE	T1	N0	M0	Stage I	G2	4	3,4 - Fibrous Speta	Mild	None	NO	Alcohol consumption	13084.7
TCGA-DD-A73E	44	0	66	MALE	172	108	36.5062	WHITE	T1	N0	M0	Stage I	G1	1	0 - No Fibrosis	Mild	None	YES	Alcohol consumption;Non-Alcoholic Fatty Liver Disease	14131.7
TCGA-DD-AAC8	16	1	72	MALE	156	57	23.4221	ASIAN	T1	N0	M0	Stage I	G3	1	1,2 - Portal Fibrosis	Mild	Micro	NO	Hepatitis B	19347.7
TCGA-DD-AAC9	347	0	51	MALE	174	81	26.7539	ASIAN	T1	N0	M0	Stage I	G2	5	6 - Established Cirrhosis	Mild	None	NO	Hepatitis B	15166.1
TCGA-DD-AACA	2301	0	65	MALE	165	70	25.7117	ASIAN	T1	N0	M0	Stage I	G3	7	6 - Established Cirrhosis	Mild	None	NO	Hepatitis B	22273.7
TCGA-DD-AACA	2301	0	65	MALE	165	70	25.7117	ASIAN	T1	N0	M0	Stage I	G3	7	6 - Established Cirrhosis	Mild	None	NO	Hepatitis B	16988.6
TCGA-DD-AACA	2301	0	65	MALE	165	70	25.7117	ASIAN	T1	N0	M0	Stage I	G3	7	6 - Established Cirrhosis	Mild	None	NO	Hepatitis B	13352.1
TCGA-DD-AACC	1685	1	61	MALE	165	61	22.4059	ASIAN	T1	N0	M0	Stage I	G2	24	6 - Established Cirrhosis	Mild	None	NO	Hepatitis B	15001.1
TCGA-DD-AACD	381	1	48	MALE	182	66	19.9251	ASIAN	T1	N0	M0	Stage I	G4	2	1,2 - Portal Fibrosis	Mild	Micro	YES	Hepatitis B	13551.5
TCGA-DD-AACE	2184	0	62	MALE	162	62	23.6244	ASIAN	T1	N0	M0	Stage I	G3	2	6 - Established Cirrhosis	Mild	None	NO	Hepatitis B	13492.3
TCGA-DD-AACF	365	1	68	MALE	168	60	21.2585	ASIAN	T1	N0	M0	Stage I	G3	16	6 - Established Cirrhosis	Mild	None	NO	Hepatitis C	17967.4
TCGA-DD-AACG	469	1	52	MALE	168	65	23.03	ASIAN	T2	N0	M0	Stage II	G4	11718	6 - Established Cirrhosis	Mild	Micro	NO	Hepatitis B	16490.1
TCGA-DD-AACH	195	1	69	MALE	160	53	20.7031	ASIAN	T2	N0	M0	Stage II	G3	7	6 - Established Cirrhosis	Mild	Micro	NO	Hepatitis B	12606
TCGA-DD-AACI	1618	0	69	MALE	155	48	19.9792	ASIAN	T2	N0	M0	Stage II	G3	1	5 - Nodular Formation and Incomplete Cirrhosis	Mild	None	NO	Unknown	13431.6
TCGA-DD-AACJ	2102	0	75	MALE	159	73	28.8754	ASIAN	T2	N0	M0	Stage II	G2	25	Not Available	Not Available	Micro	NO	Unknown	12765.7
TCGA-DD-AACK	9	0	70	MALE	172	68	22.9854	ASIAN	T1	N0	M0	Stage I	G2	5	6 - Established Cirrhosis	None	Micro	NO	Hepatitis B	12892.2
TCGA-DD-AACN	1302	0	32	MALE	171	70	23.939	ASIAN	T1	N0	M0	Stage I	G3	699	Unknown	Unknown	None	NO	Hepatitis B	11939.6
TCGA-DD-AACO	1876	0	40	MALE	164	43	15.9875	ASIAN	T1	N0	M0	Stage I	G3	5	6 - Established Cirrhosis	Mild	None	NO	Hepatitis B	14085.3
TCGA-DD-AACP	415	0	64	MALE	155	62	25.8065	ASIAN	T1	N0	M0	Stage I	G3	227	Unknown	None	None	NO	Alcohol consumption	15041.4
TCGA-DD-AACQ	432	1	50	MALE	169	64	22.4082	ASIAN	T2	N0	M0	Stage II	G3	7	Unknown	Unknown	None	NO	Hepatitis B	11587.6
TCGA-DD-AACS	1804	0	39	MALE	172	80	27.0416	ASIAN	T1	N0	M0	Stage I	G3	1	Unknown	Unknown	None	NO	Hepatitis B	11225.3
TCGA-DD-AACU	1567	0	59	MALE	166	67	24.3141	ASIAN	T1	N0	M0	Stage I	G3	22	Unknown	Unknown	None	NO	Hepatitis B	16100.9
TCGA-DD-AACV	1531	0	53	MALE	169	70	24.5089	ASIAN	T1	N0	M0	Stage I	G3	9	Unknown	Unknown	Micro	NO	Alcohol consumption	18990.7
TCGA-DD-AACW	1424	0	43	MALE	166	65	23.5883	ASIAN	T1	N0	M0	Stage I	G3	1726	Unknown	Unknown	None	NO	Alcohol consumption;Hepatitis B	10234.1
TCGA-DD-AACX	170	0	66	MALE	155	53	22.0604	ASIAN	T2	N0	M0	Stage II	G3	3	3,4 - Fibrous Speta	Mild	None	NO	Alcohol consumption;Hepatitis B	15295.7
TCGA-DD-AACY	1450	0	61	MALE	162	62	23.6244	ASIAN	T1	N0	M0	Stage I	G3	290	3,4 - Fibrous Speta	Mild	None	NO	Hepatitis B	15777.1
TCGA-DD-AAD2	658	0	66	MALE	156	52	21.3675	ASIAN	T1	N0	M0	Stage I	G2	25	1,2 - Portal Fibrosis	Mild	Micro	NO	Hepatitis B	12919.3
TCGA-DD-AAD3	1295	0	43	MALE	178	77	24.3025	ASIAN	T1	N0	M0	Stage I	G2	Not Available	1,2 - Portal Fibrosis	Mild	None	NO	Alcohol consumption;Hepatitis B	14722
TCGA-DD-AAD5	1345	0	54	MALE	170	70	24.2215	ASIAN	T1	N0	M0	Stage I	G3	73	3,4 - Fibrous Speta	Mild	None	NO	Alcohol consumption;Hepatitis B	23532.5
TCGA-DD-AAD6	672	0	66	MALE	167	93	33.3465	ASIAN	T3a	N0	M0	Stage IIIA	G3	Not Available	Unknown	Unknown	None	NO	Hepatitis B	21383.2
TCGA-DD-AADB	1242	0	51	MALE	165	68	24.977	ASIAN	T1	N0	M0	Stage I	G4	419	Unknown	Unknown	None	NO	Hepatitis B	17518.4
TCGA-DD-AADC	425	1	53	MALE	176	81	26.1493	ASIAN	T1	N0	M0	Stage I	G3	36	Unknown	Unknown	Macro	NO	Hepatitis B	6304.59
TCGA-DD-AADD	1231	0	51	MALE	168	68	24.093	ASIAN	T1	N0	M0	Stage I	G4	9804	Unknown	Unknown	None	NO	Hepatitis B	11564.1
TCGA-DD-AADG	1145	0	70	MALE	160	61	23.8281	ASIAN	T3a	N0	M0	Stage IIIA	G3	2256	3,4 - Fibrous Speta	Mild	None	NO	Alcohol consumption;Hepatitis B	12714.3
TCGA-DD-AADL	636	0	58	MALE	159	53	20.9644	ASIAN	T1	N0	M0	Stage I	G4	14	Unknown	Unknown	Micro	YES	Alcohol consumption;Hepatitis B	18801.5
TCGA-DD-AADM	12	1	58	MALE	159	55	21.7555	ASIAN	T2	N0	M0	Stage II	G3	112	Unknown	Unknown	None	NO	Alcohol consumption;Hepatitis B	15567.5
TCGA-DD-AADN	898	0	59	MALE	160	62	24.2188	ASIAN	T1	NX	MX	Stage I	G4	151367	Unknown	Unknown	Micro	NO	Alcohol consumption;Hepatitis B	25209.3
TCGA-DD-AADO	453	0	55	MALE	168	58	20.5499	ASIAN	T1	N0	M0	Stage I	G3	176037	Unknown	Unknown	Micro	NO	Alcohol consumption;Hepatitis B	13098.2
TCGA-DD-AADP	458	0	45	MALE	167	67	24.0238	ASIAN	T1	N0	M0	Stage I	G3	9	Unknown	Unknown	Micro	NO	Hepatitis B	12921.9
TCGA-DD-AADQ	436	0	59	MALE	165	64	23.5078	ASIAN	T2	N0	M0	Stage II	G3	7	Unknown	Unknown	None	NO	Alcohol consumption;Hepatitis B	11368.1
TCGA-DD-AADR	2028	0	58	MALE	170	75	25.9516	ASIAN	T1	N0	M0	Stage I	G3	3	6 - Established Cirrhosis	Mild	None	NO	Alcohol consumption;Hepatitis B	14683.3
TCGA-DD-AADS	474	0	63	MALE	164	53	19.7055	ASIAN	T1	N0	M0	Stage I	G2	11	Unknown	Unknown	None	YES	Alcohol consumption;Hepatitis C	12402.2
TCGA-DD-AADU	554	0	60	MALE	166	73	26.4915	ASIAN	T2	N0	M0	Stage II	G3	52	3,4 - Fibrous Speta	None	Micro	YES	Alcohol consumption	14959.2
TCGA-DD-AADV	574	0	50	MALE	176	64	20.6612	ASIAN	T1	N0	M0	Stage I	G3	11	6 - Established Cirrhosis	None	None	NO	Alcohol consumption;Hepatitis B	12408
TCGA-DD-AADW	587	0	48	MALE	163	49	18.4425	ASIAN	T1	N0	M0	Stage I	G3	250	6 - Established Cirrhosis	None	None	NO	Hepatitis B	14717.3
TCGA-DD-AAE1	552	0	52	MALE	169	62	21.7079	ASIAN	T1	N0	M0	Stage I	G3	2693	6 - Established Cirrhosis	Mild	None	NO	Hepatitis B	12217.2
TCGA-DD-AAE2	638	0	51	MALE	174	82	27.0842	ASIAN	T1	N0	M0	Stage I	G3	41	6 - Established Cirrhosis	None	None	NO	Hepatitis B	12206.6
TCGA-DD-AAE3	566	0	50	MALE	165	73	26.8136	ASIAN	T1	N0	M0	Stage I	G2	2	1,2 - Portal Fibrosis	None	None	NO	Alcohol consumption;Hepatitis B	13408.2
TCGA-DD-AAE7	644	0	72	MALE	172	74	25.0135	ASIAN	T1	N0	M0	Stage I	G2	1	3,4 - Fibrous Speta	Severe	None	NO	Alcohol consumption;Hepatitis B	12526.1
TCGA-DD-AAE9	722	0	69	MALE	165	63	23.1405	ASIAN	T1	N0	M0	Stage I	G3	3	1,2 - Portal Fibrosis	Mild	None	NO	Alcohol consumption;Hepatitis B	17019.5
TCGA-DD-AAEA	575	0	65	MALE	163	66	24.841	ASIAN	T1	N0	M0	Stage I	G3	2	1,2 - Portal Fibrosis	Unknown	None	NO	Alcohol consumption;Hepatitis B	7115.78
TCGA-DD-AAEB	478	0	60	MALE	161	75	28.9341	ASIAN	T1	N0	M0	Stage I	G2	1	Unknown	Unknown	None	NO	Alcohol consumption;Hepatitis B	12075.6
TCGA-DD-AAED	763	0	51	MALE	166	69	25.0399	ASIAN	T1	N0	M0	Stage I	G3	2405	1,2 - Portal Fibrosis	Mild	None	NO	Alcohol consumption;Hepatitis B	7888.36
TCGA-DD-AAEE	810	0	55	MALE	160	58	22.6562	ASIAN	T1	N0	M0	Stage I	G4	3	6 - Established Cirrhosis	None	None	NO	Hepatitis B	15307
TCGA-DD-AAEH	784	0	73	MALE	163	62	23.3355	ASIAN	T1	N0	M0	Stage I	G2	Not Available	1,2 - Portal Fibrosis	None	Micro	NO	Unknown	12224.3
TCGA-DD-AAEI	1531	0	72	MALE	166	79	28.6689	ASIAN	T1	N0	M0	Stage I	G2	24	6 - Established Cirrhosis	None	None	NO	Hepatitis B	17447.3
TCGA-DD-AAEK	1067	0	51	MALE	169	64	22.4082	ASIAN	T2	N0	M0	Stage II	G3	5166	6 - Established Cirrhosis	None	None	NO	Hepatitis B	14589
TCGA-DD-AAVP	2752	0	48	MALE	167	62	22.231	ASIAN	T1	N0	M0	Stage I	G1	2	6 - Established Cirrhosis	Severe	None	YES	Hepatitis B	21509.9
TCGA-DD-AAVQ	2728	0	38	MALE	171	72	24.623	ASIAN	T1	N0	M0	Stage I	G2	1456	6 - Established Cirrhosis	Severe	None	NO	Hepatitis B	9832.46
TCGA-DD-AAVR	2513	0	44	MALE	165	69	25.3444	ASIAN	T1	N0	M0	Stage I	G2	36	6 - Established Cirrhosis	None	None	YES	Hepatitis B	18636.4
TCGA-DD-AAVS	1823	0	56	MALE	169	72	25.2092	ASIAN	T1	N0	M0	Stage I	G2	50149	3,4 - Fibrous Speta	Mild	None	NO	Hepatitis B	12140.3
TCGA-DD-AAVU	2202	0	46	MALE	160	88	34.375	ASIAN	T2	N0	M0	Stage II	G2	2	3,4 - Fibrous Speta	Mild	Micro	NO	Hepatitis B	12384.3
TCGA-DD-AAVV	2455	0	56	MALE	158	71	28.441	ASIAN	T2	N0	M0	Stage II	G3	7	3,4 - Fibrous Speta	Mild	Micro	NO	Hepatitis B	12321.6
TCGA-DD-AAVW	2317	0	35	MALE	162	62	23.6244	ASIAN	T1	N0	M0	Stage I	G2	927	6 - Established Cirrhosis	None	None	NO	Hepatitis B	12408.8
TCGA-DD-AAVX	1718	0	38	MALE	178	65	20.5151	ASIAN	T2	N0	M0	Stage II	G2	1	6 - Established Cirrhosis	Severe	Micro	YES	Hepatitis B	13257.2
TCGA-DD-AAVY	1970	0	56	MALE	161	63	24.3046	ASIAN	T3	N0	M0	Stage IIIA	G2	11	0 - No Fibrosis	None	Micro	YES	No History of Primary Risk Factors	12479.1
TCGA-DD-AAVZ	1900	0	38	MALE	171	62	21.2031	ASIAN	T1	N0	M0	Stage I	G2	945	6 - Established Cirrhosis	None	None	YES	Hepatitis B	12204.3
TCGA-DD-AAW0	2015	0	54	MALE	172	75	25.3515	ASIAN	T1	N0	M0	Stage I	G2	3	3,4 - Fibrous Speta	Mild	None	YES	Hepatitis B	12188.5
TCGA-DD-AAW1	1989	0	55	MALE	167	60	21.5139	ASIAN	T3	N0	M0	Stage IIIA	G2	4	6 - Established Cirrhosis	Severe	Micro	NO	No History of Primary Risk Factors	16080.6
TCGA-DD-AAW2	1855	0	69	MALE	156	50	20.5457	ASIAN	T1	N0	M0	Stage I	G2	3	6 - Established Cirrhosis	None	None	YES	Non-Alcoholic Fatty Liver Disease	20991
TCGA-DD-AAW3	1633	0	69	MALE	162	64	24.3865	ASIAN	T1	N0	M0	Stage I	G2	3	0 - No Fibrosis	None	None	YES	No History of Primary Risk Factors	11910.3
TCGA-ED-A459	910	0	47	MALE	167	51	18.2868	ASIAN	T2	N0	M0	Stage II	G2	267	Not Available	Not Available	Micro	NO	Unknown	15627.6
TCGA-ED-A4XI	819	0	58	MALE	170	55	19.0311	ASIAN	T2	N0	M0	Stage II	G3	573	Not Available	None	Micro	NO	No History of Primary Risk Factors	13369.1
TCGA-ED-A627	423	0	74	MALE	176	74	23.8895	WHITE	T1	NX	M0	Stage I	G2	Not Available	Unknown	Unknown	Unknown	Unknown	Alcohol consumption	15177.8
TCGA-ED-A66X	406	0	35	MALE	170	61	21.1073	ASIAN	T3a	N0	M0	Stage IIIA	G3	5840	Not Available	Mild	Micro	NO	Alcohol consumption	12277
TCGA-ED-A7PZ	6	0	61	MALE	159	50	19.7777	ASIAN	T2	NX	M0	Stage II	G2	2	Not Available	Mild	Micro	NO	No History of Primary Risk Factors	13192.9
TCGA-ED-A7XO	427	0	29	MALE	175	64	20.898	ASIAN	T3a	N0	M0	Stage IIIA	G2	4	Not Available	Mild	Micro	NO	No History of Primary Risk Factors	12584
TCGA-ED-A97K	6	0	54	MALE	170	64	22.1453	ASIAN	T3a	N0	M0	Stage IIIA	G2	3	Not Available	Mild	Micro	NO	Alcohol consumption	12869.7
TCGA-EP-A12J	570	0	62	MALE	173	Not Available	NA	BLACK OR AFRICAN AMERICAN	T1	NX	MX	Stage I	G1	Not Available	Not Available	Not Available	None	YES	Hepatitis C	14067.5
TCGA-EP-A26S	608	0	70	MALE	168	41	14.5266	WHITE	T1	N0	MX	Stage I	G2	Not Available	0 - No Fibrosis	Mild	None	NO	Alcohol consumption	10312.8
TCGA-EP-A2KC	19	1	62	MALE	171	Not Available	NA	BLACK OR AFRICAN AMERICAN	T1	NX	MX	Stage I	G3	43	Not Available	Not Available	None	NO	Hepatitis C	11692
TCGA-EP-A3JL	303	0	76	MALE	168	73	25.8645	WHITE	T1	NX	MX	Stage I	G2	13	Not Available	Not Available	None	NO	Alcohol consumption	12246.3
TCGA-EP-A3RK	363	0	73	MALE	178	101	31.8773	WHITE	T3a	NX	MX	Stage IIIA	G2	7	1,2 - Portal Fibrosis	Not Available	Not Available	NO	Alcohol consumption	14258
TCGA-ES-A2HS	688	1	80	MALE	180	97	29.9383	WHITE	T1	NX	MX	Stage I	G2	1	0 - No Fibrosis	Mild	None	NO	No History of Primary Risk Factors	18600.3
TCGA-ES-A2HT	438	1	54	MALE	174	80	26.4236	BLACK OR AFRICAN AMERICAN	T1	NX	MX	Stage I	G2	4	0 - No Fibrosis	Mild	None	NO	Hepatitis C	16723.8
TCGA-FV-A2QQ	729	0	80	MALE	Not Available	Not Available	NA	WHITE	T1	N0	MX	Stage I	G2	Not Available	Not Available	Not Available	None	Unknown	Alcohol consumption	14642
TCGA-FV-A2QR	581	1	75	MALE	Not Available	Not Available	NA	WHITE	T1	N0	M0	Stage I	G1	Not Available	Not Available	Not Available	Not Available	YES	Other	15600.1
TCGA-FV-A3R2	194	1	75	MALE	Not Available	75	NA	WHITE	T1	NX	MX	Stage I	Not Available	Not Available	Not Available	Not Available	Not Available	YES	No History of Primary Risk Factors	15480.3
TCGA-FV-A4ZP	2486	1	78	MALE	168	69	24.4473	WHITE	T3	NX	M0	Stage IIIA	G2	20326	Unknown	Unknown	Micro	Unknown	Alcohol consumption	15955.8
TCGA-FV-A4ZQ	12	0	52	MALE	Not Available	Not Available	NA	WHITE	T1	NX	M0	Stage I	G2	Not Available	Unknown	Unknown	None	Unknown	Hepatitis C	13517.5
TCGA-G3-A25S	416	1	64	MALE	166	73	26.4915	WHITE	T1	N0	M0	Stage I	G2	281	6 - Established Cirrhosis	Mild	Micro	NO	Alcohol consumption	14648.9
TCGA-G3-A25V	860	0	68	MALE	187	90	25.7371	WHITE	T1	N0	M0	Stage I	G2	15	6 - Established Cirrhosis	None	None	NO	Alcohol consumption	15465.4
TCGA-G3-A25X	1779	0	73	MALE	165	65	23.8751	ASIAN	T2	N0	M0	Stage II	G3	11	1,2 - Portal Fibrosis	Mild	None	NO	Hepatitis B	16633
TCGA-G3-A25Z	655	0	58	MALE	173	69	23.0546	ASIAN	T1	N0	M0	Stage I	G2	44	5 - Nodular Formation and Incomplete Cirrhosis	Mild	None	YES	Hepatitis B	15457.9
TCGA-G3-A3CG	673	0	80	MALE	168	93	32.9507	WHITE	T1	N0	M0	Stage I	G2	67	6 - Established Cirrhosis	Severe	Micro	NO	Hepatitis C	11685.6
TCGA-G3-A3CH	780	0	53	MALE	178	74	23.3556	ASIAN	T3a	N0	M0	Stage IIIA	G2	41	6 - Established Cirrhosis	Severe	None	NO	Hepatitis B	13553.1
TCGA-G3-A3CI	180	0	71	MALE	167	98	35.1393	WHITE	T1	N0	M0	Stage I	G2	2	0 - No Fibrosis	Mild	None	NO	Non-Alcoholic Fatty Liver Disease	9149.92
TCGA-G3-A3CJ	594	0	52	MALE	174	72	23.7812	AMERICAN INDIAN OR ALASKA NATIVE	T2	N0	M0	Stage II	G2	3	5 - Nodular Formation and Incomplete Cirrhosis	Severe	Micro	NO	Hepatitis C	12097.9
TCGA-G3-A3CK	585	0	61	MALE	170	67	23.1834	ASIAN	T1	N0	M0	Stage I	G2	3	6 - Established Cirrhosis	Mild	None	YES	Hepatitis B	12501.7
TCGA-G3-A5SI	768	1	44	MALE	177	74	23.6203	ASIAN	T2	N0	M0	Stage II	G2	9	6 - Established Cirrhosis	Mild	None	Unknown	Hepatitis C	22594.1
TCGA-G3-A5SJ	698	0	59	MALE	171	87	29.7527	WHITE	T1	NX	M0	Stage I	G2	3	6 - Established Cirrhosis	Mild	None	NO	Alcohol consumption;Hepatitis C	16145.2
TCGA-G3-A5SK	744	0	58	MALE	169	67	23.4586	WHITE	T1	NX	M0	Stage I	G1	Not Available	6 - Established Cirrhosis	Mild	Unknown	Unknown	Hepatitis C	15817.7
TCGA-G3-A5SL	621	0	70	MALE	180	88	27.1605	WHITE	T2	NX	M0	Stage II	G2	4	0 - No Fibrosis	None	Micro	NO	Alcohol consumption	16029
TCGA-G3-A5SM	520	0	58	MALE	184	106	31.3091	WHITE	T2	NX	M0	Stage II	G3	12	6 - Established Cirrhosis	Unknown	None	NO	Alcohol consumption;Hepatitis C	13913.3
TCGA-G3-A6UC	671	0	65	MALE	182	91	27.4725	WHITE	T3b	N0	M0	Stage IIIB	G2	4	6 - Established Cirrhosis	Mild	Micro	Unknown	Alcohol consumption	11277.7
TCGA-G3-A7M5	447	0	76	MALE	164	68	25.2826	ASIAN	T1	NX	MX	Stage I	G2	6	0 - No Fibrosis	None	None	NO	Alcohol consumption	8155.31
TCGA-G3-A7M7	361	0	65	MALE	181	77	23.5036	WHITE	T1	NX	MX	Stage I	G1	4	3,4 - Fibrous Speta	Severe	None	Unknown	Alcohol consumption	15534.5
TCGA-G3-A7M8	430	0	31	MALE	Not Available	Not Available	NA	ASIAN	T1	NX	MX	Stage I	G1	5	6 - Established Cirrhosis	Unknown	None	Unknown	Alcohol consumption	11761.1
TCGA-G3-A7M9	56	1	70	MALE	170	73	25.2595	WHITE	T3b	NX	MX	Stage IIIB	G2	22868	6 - Established Cirrhosis	None	Macro	Unknown	Hemochromatosis	9150.49
TCGA-G3-AAUZ	480	0	48	MALE	160	77	30.0781	Unknown	T1	N0	M0	Stage I	G2	3	1,2 - Portal Fibrosis	Severe	None	Unknown	Hepatitis B;Non-Alcoholic Fatty Liver Disease	14130
TCGA-G3-AAV0	476	0	58	MALE	158	58	23.2335	ASIAN	T1	N0	M0	Stage I	G2	4	0 - No Fibrosis	None	None	Unknown	Hepatitis B	8514
TCGA-G3-AAV1	359	1	51	MALE	181	99	30.2189	ASIAN	T4	N0	M0	Stage IIIC	G3	8	6 - Established Cirrhosis	Severe	Micro	Unknown	Hepatitis B	10299
TCGA-G3-AAV2	372	0	50	MALE	Not Available	Not Available	NA	WHITE	T1	N0	M0	Stage I	G1	4	6 - Established Cirrhosis	Not Available	None	Unknown	Alcohol consumption;Hepatitis C	23670.1
TCGA-G3-AAV5	354	0	67	MALE	165	88	32.3232	WHITE	T2	N0	M0	Stage II	G2	Not Available	6 - Established Cirrhosis	Not Available	Macro	Unknown	Alcohol consumption	12811.1
TCGA-G3-AAV7	361	0	38	MALE	165	58	21.3039	ASIAN	T2	N0	M0	Stage II	G2	3	5 - Nodular Formation and Incomplete Cirrhosis	Mild	Micro	Unknown	Hepatitis B	22596.1
TCGA-GJ-A3OU	879	0	59	MALE	167	172	61.6731	WHITE	T1	NX	MX	Stage I	G2	8	Unknown	Unknown	None	YES	Alcohol consumption;Non-Alcoholic Fatty Liver Disease;Other	21576
TCGA-GJ-A9DB	67	1	68	MALE	187	96	27.4529	WHITE	T1	N0	MX	Stage I	G2	Not Available	Unknown	Unknown	None	YES	No History of Primary Risk Factors	10015.3
TCGA-HP-A5MZ	91	1	78	MALE	185	82	23.9591	Not Evaluated	T1	NX	M0	Stage I	G2	Not Available	Not Available	Not Available	None	Unknown	No History of Primary Risk Factors	14263
TCGA-K7-A5RF	631	0	64	MALE	177	75	23.9395	WHITE	T1	NX	MX	Stage I	G1	5	Not Available	Not Available	Unknown	NO	Hepatitis C	12145.7
TCGA-K7-A5RG	519	0	66	MALE	173	123	41.0973	BLACK OR AFRICAN AMERICAN	T1	NX	MX	Stage I	G1	19	Not Available	Not Available	None	YES	Alcohol consumption;Hepatitis C	14137.9
TCGA-K7-A6G5	512	0	66	MALE	184	80	23.6295	WHITE	T1	N0	MX	Stage I	G2	Not Available	Not Available	Not Available	None	Not Available	Alcohol consumption;Hepatitis B;Hepatitis C;Hemochromatosis	16935.8
TCGA-K7-AAU7	359	0	61	MALE	Not Available	Not Available	NA	WHITE	T2a	NX	MX	Stage II	G2	290	Not Available	Not Available	Micro	YES	Hepatitis C;Hemochromatosis	11899.5
TCGA-KR-A7K0	65	1	65	MALE	174	66	21.7994	WHITE	T1	N0	M0	Stage I	G1	11	Not Available	Not Available	None	NO	Alcohol consumption;Hepatitis C	12430
TCGA-KR-A7K2	829	0	64	MALE	166	79	28.6689	WHITE	T1	N0	M0	Stage I	G1	14	Not Available	Unknown	None	Unknown	Hepatitis C	11198.5
TCGA-KR-A7K8	906	0	57	MALE	170	109	37.7163	Unknown	T1	N0	M0	Stage I	G1	154	Not Available	None	None	YES	No History of Primary Risk Factors	13095.4
TCGA-LG-A9QC	425	0	48	MALE	188	103	29.1421	WHITE	T1	NX	M0	Stage I	G2	Not Available	Unknown	Mild	Micro	YES	No History of Primary Risk Factors	8553.67
TCGA-LG-A9QD	366	0	68	MALE	168	74	26.2188	WHITE	T3a	N0	M0	Stage IIIA	G2	Not Available	Unknown	Mild	None	YES	No History of Primary Risk Factors	13293.4
TCGA-MI-A75C	291	0	64	MALE	175	84	27.4286	WHITE	T1	N0	M0	Stage I	G3	4	Not Available	Not Available	None	Unknown	Hepatitis C	11202.8
TCGA-MI-A75E	507	0	61	MALE	175	103	33.6327	WHITE	T4	N0	M0	Stage IIIC	G2	5	1,2 - Portal Fibrosis	Not Available	Micro	YES	Alcohol consumption;Hepatitis C	13862.3
TCGA-MI-A75G	698	0	63	MALE	178	69	21.7776	WHITE	T2	N0	M0	Stage II	G2	6	6 - Established Cirrhosis	Not Available	None	YES	Alcohol consumption;Hepatitis C	17547.4
TCGA-MI-A75H	747	0	77	MALE	173	84	28.0664	WHITE	NA	NX	MX	NA	Not Available	11	6 - Established Cirrhosis	Not Available	Micro	Unknown	Hepatitis C	14347.6
TCGA-MI-A75I	630	0	61	MALE	188	100	28.2933	BLACK OR AFRICAN AMERICAN	T2	NX	MX	NA	G1	Not Available	Not Available	Not Available	Unknown	YES	Hepatitis C	14249.9
TCGA-MR-A520	229	0	58	MALE	179	104	32.4584	WHITE	T1	NX	MX	Stage I	G1	Not Available	Not Available	Not Available	Not Available	Not Available	Other	10945.7
TCGA-MR-A8JO	330	0	34	MALE	196	90	23.4277	WHITE	T1	N0	MX	Stage I	G3	2	Not Available	Not Available	None	NO	Alcohol consumption	11303.5
TCGA-NI-A4U2	1791	1	71	MALE	171	82	28.0428	WHITE	T3	NX	MX	Stage IIIA	G1	5	1,2 - Portal Fibrosis	None	None	YES	Alcohol consumption	16362.7
TCGA-NI-A8LF	799	0	74	MALE	171	104	35.5665	WHITE	T1	NX	MX	Stage I	G3	Not Available	Unknown	None	None	YES	Alcohol consumption	10952.7
TCGA-O8-A75V	538	0	54	MALE	180	92	28.3951	Unknown	T1	NX	MX	Stage I	G2	7	6 - Established Cirrhosis	Mild	None	YES	Alcohol consumption;Hepatitis B;Hepatitis C	13203.1
TCGA-QA-A7B7	94	0	48	MALE	180	108	33.3333	BLACK OR AFRICAN AMERICAN	T2	NX	MX	Stage II	G2	1751	0 - No Fibrosis	Mild	Micro	NO	Hepatitis B	16527
TCGA-RC-A6M3	0	0	24	MALE	175	Not Available	NA	AMERICAN INDIAN OR ALASKA NATIVE	T2	N0	M0	Stage II	G3	Not Available	Not Available	Not Available	Micro	NO	Unknown	13418.3
TCGA-RC-A6M6	9	0	75	MALE	Not Available	Not Available	NA	WHITE	T2	NX	M0	Stage II	G3	12986	Not Available	Not Available	None	Unknown	Alcohol consumption	16734.9
TCGA-RC-A7SB	588	0	53	MALE	166	61	22.1367	ASIAN	T2	N0	M0	Stage II	G2	3	0 - No Fibrosis	None	None	Unknown	Hepatitis B	11939
TCGA-RC-A7SF	579	0	66	MALE	170	76	26.2976	ASIAN	T1	N0	M0	Stage I	G2	87	3,4 - Fibrous Speta	None	None	Unknown	Hepatitis C	11213.4
TCGA-RC-A7SH	468	0	42	MALE	174	68	22.46	ASIAN	T2	N0	M0	Stage II	G3	2466	3,4 - Fibrous Speta	None	Micro	Unknown	Hepatitis B	9689.86
TCGA-RC-A7SK	472	0	59	MALE	169	60	21.0077	ASIAN	T1	N0	M0	Stage I	G3	25	1,2 - Portal Fibrosis	None	Micro	Unknown	Hepatitis C	13909.6
TCGA-RG-A7D4	1098	0	69	MALE	172	87	29.4078	BLACK OR AFRICAN AMERICAN	T2	N0	M0	Stage II	G2	5650	Unknown	Unknown	Unknown	YES	Hepatitis C	13287.5
TCGA-T1-A6J8	23	0	68	MALE	188	65	18.3907	WHITE	T1	NX	M0	NA	G2	Not Available	Not Available	Not Available	None	Unknown	Alcohol consumption	15775.2
TCGA-UB-A7MB	601	0	24	MALE	180	62	19.1358	WHITE	T2	NX	MX	Stage II	G3	1865	0 - No Fibrosis	None	Micro	NO	No History of Primary Risk Factors	15503.9
TCGA-UB-A7MC	500	0	59	MALE	176	78	25.1808	WHITE	T3a	N0	MX	Stage IIIA	G3	126	1,2 - Portal Fibrosis	Mild	Micro	NO	Alcohol consumption;Hepatitis B	13461.6
TCGA-UB-A7MD	52	1	67	MALE	175	57	18.6122	BLACK OR AFRICAN AMERICAN	T1	N0	MX	Stage I	G3	23	6 - Established Cirrhosis	Unknown	Micro	NO	Alcohol consumption;Hepatitis C	14820.9
TCGA-UB-A7ME	486	0	51	MALE	165	75	27.5482	ASIAN	T1	NX	MX	Stage I	G2	1388	1,2 - Portal Fibrosis	Mild	None	NO	Hepatitis B	10118.9
TCGA-UB-A7MF	214	1	56	MALE	195	95	24.9836	WHITE	T3a	NX	MX	Stage IIIA	G2	2505	6 - Established Cirrhosis	Unknown	Micro	YES	Hepatitis B;Hepatitis C	12119.8
TCGA-UB-AA0U	327	0	60	MALE	178	93	29.3524	WHITE	T2	NX	MX	Stage II	G2	26	0 - No Fibrosis	Mild	None	YES	Non-Alcoholic Fatty Liver Disease	12525.7
TCGA-WQ-AB4B	395	0	62	MALE	175	122	39.8367	WHITE	T2	NX	M0	Stage II	G2	5	Not Available	Not Available	Micro	NO	Alcohol consumption;Non-Alcoholic Fatty Liver Disease;Other	12783.6
TCGA-WX-AA46	756	0	61	MALE	156	75	30.8185	WHITE	T2	NX	MX	Stage II	G1	1	0 - No Fibrosis	None	Macro	YES	No History of Primary Risk Factors	11356.9
TCGA-XR-A8TE	925	0	16	MALE	157	43	17.4449	WHITE	T3	N0	MX	Stage IIIA	G1	809	0 - No Fibrosis	None	None	NO	No History of Primary Risk Factors	9739.64
TCGA-XR-A8TF	693	1	74	MALE	166	57	20.6852	WHITE	T1	NX	MX	Stage I	G1	39	3,4 - Fibrous Speta	None	None	NO	Hepatitis B	11006
TCGA-XR-A8TG	898	0	58	MALE	184	71	20.9712	WHITE	T1	NX	M0	Stage I	G2	1	6 - Established Cirrhosis	Mild	None	YES	Hepatitis C	13234.2
TCGA-YA-A8S7	412	1	68	MALE	164	73	27.1416	WHITE	T3a	N0	MX	Stage IIIA	G3	56	Unknown	Mild	None	NO	Hepatitis C	19628.7
TCGA-ZP-A9CV	1088	1	59	MALE	173	59	19.7133	WHITE	T1	NX	MX	NA	G1	48	Not Available	Severe	None	NO	Alcohol consumption;Hepatitis C	14307.4
TCGA-ZP-A9CZ	706	0	72	MALE	167	73	26.1752	ASIAN	T1	NX	MX	NA	G1	8	3,4 - Fibrous Speta	Not Available	None	YES	Hepatitis B	13837.4
TCGA-ZP-A9D2	765	1	51	MALE	172	74	25.0135	WHITE	T2	NX	MX	NA	G2	Not Available	1,2 - Portal Fibrosis	Mild	Micro	YES	Hepatitis C	8798.06
TCGA-ZS-A9CD	1386	1	73	MALE	Not Available	Not Available	NA	WHITE	T2	NX	MX	Stage II	G2	Not Available	5 - Nodular Formation and Incomplete Cirrhosis	Mild	None	Unknown	Unknown	13675.7
TCGA-ZS-A9CF	2412	0	64	MALE	Not Available	Not Available	NA	WHITE	T2	NX	MX	Stage II	G2	Not Available	0 - No Fibrosis	None	Micro	Unknown	Hemochromatosis	11466.9
TCGA-ZS-A9CF	2412	0	64	MALE	Not Available	Not Available	NA	WHITE	T2	NX	MX	Stage II	G2	Not Available	0 - No Fibrosis	None	Micro	Unknown	Hemochromatosis	12447.6
TCGA-ZS-A9CG	341	0	55	MALE	179	94	29.3374	WHITE	T2	NX	MX	Stage II	G2	Not Available	0 - No Fibrosis	Mild	Micro	Unknown	Unknown	13694.1
